# Supplementary material for: Frequency-tunable acoustic absorption in anisotropic graphene aerogels via morphological engineering of internal barriers
Source: Royal Society of Chemistry journal article supplement (doi:10.1039/d6ra01470d), 2026-05-12
Supplement: d6ra01470d1.pdf [file d6ra01470d1.pdf]

## Supporting Information

### **Frequency-Tunable Acoustic Absorption in Anisotropic Graphene Aerogels via Morphological Engineering of Internal Barriers**

Jaeun Jin<sup>1,†</sup>, Jae Gyu Ahn<sup>1,†</sup>, An So yeon<sup>1</sup>, Ryunkyong Lee<sup>1</sup>, Taeyoung Park<sup>1</sup>, Dong Ju Lee<sup>2,\*</sup>, Sung Ho Song<sup>1,\*</sup>

\*Dong Ju Lee

E-mail: dongjulee@chungbuk.ac.kr

\*Sung Ho Song

E-mail: shsong805@kongju.ac.kr

<sup>1</sup> Division of Advanced Materials Engineering, Center for Advanced Materials and Parts of Powders, Kongju National University, Cheonan-si 31080, Republic of Korea

<sup>2</sup> Department of Urban, Energy, and Environmental Engineering, Chungbuk National University, Cheongju 28644, Republic of Korea

Supporting Information Table S1

Table S1. C1s XPS Analysis of LGO, MGO and SGO.

|                | <i>L-GO</i>   | <i>M-GO</i>   | <i>S-GO</i>   |
|----------------|---------------|---------------|---------------|
| <b>C-C/C=C</b> | <b>57.35%</b> | <b>53.04%</b> | <b>47.66%</b> |
| <b>C-OH</b>    | <b>1.20%</b>  | <b>2.75%</b>  | <b>2.92%</b>  |
| <b>C-O</b>     | <b>34.15%</b> | <b>35.82%</b> | <b>36.72%</b> |
| <b>C=O</b>     | <b>5.12%</b>  | <b>5.45%</b>  | <b>7.29%</b>  |
| <b>O-C=O</b>   | <b>2.18%</b>  | <b>2.94%</b>  | <b>5.41%</b>  |

Supporting Information Fig. S1

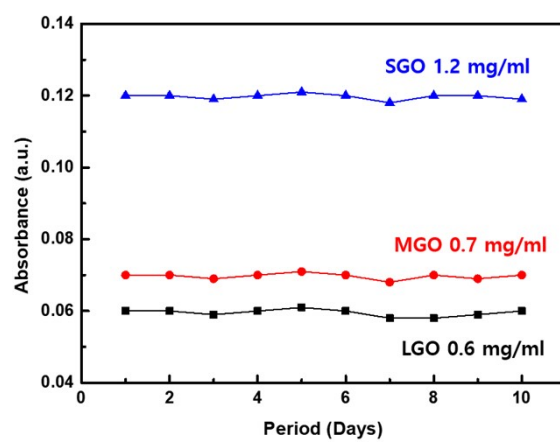

Fig. S1. Time-dependent UV-Vis analysis of LGO, MGO, and SGO dispersions at fixed concentrations of 0.6 mg/mL, 0.7 mg/mL, and 0.12 mg/mL, respectively.

Supporting Information Fig. S2

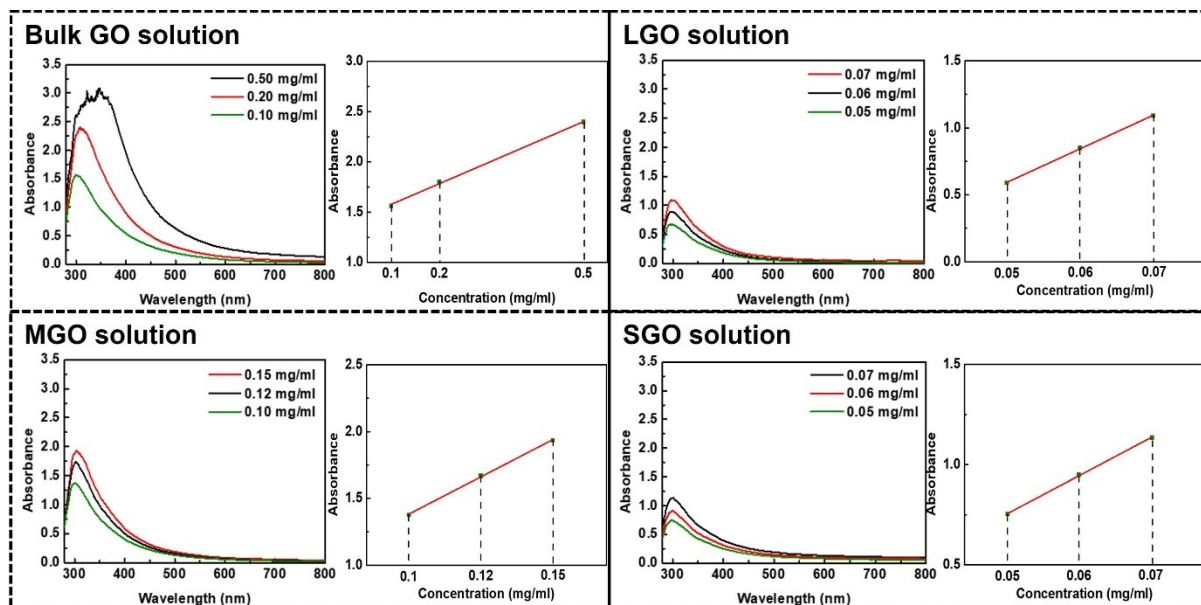

Fig. S2. UV-Vis Analysis of LGO, MGO and SGO as a function of concentration in water showing Beer Lambert behavior.

Supporting Information Fig. S3

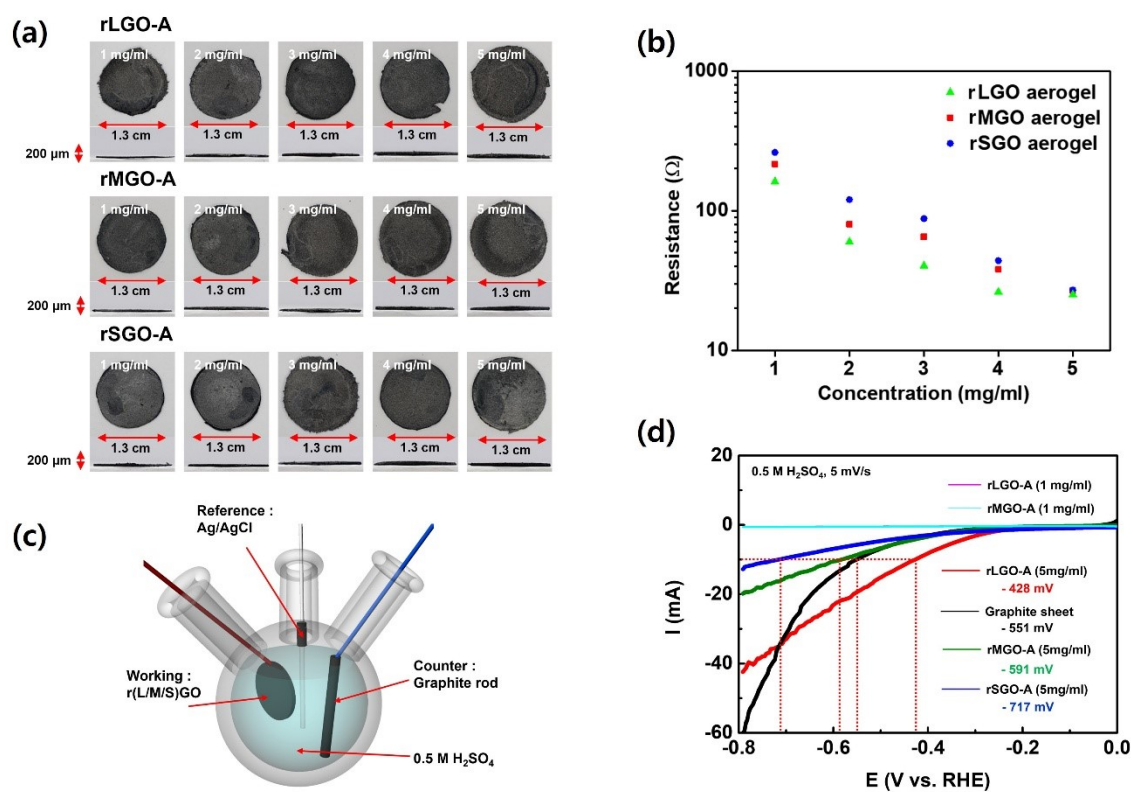

Fig. S3. Electrochemical Performance and Structural Properties of Reduced Graphene Oxide Aerogels (rGO-A). (a) The digital images of rLGO-A, rMGO-A, and rSGO-A via concentration (b) Characterization of electrical resistance of rLGO-A, rMGO-A, and rSGO-A via concentration. (c) Schematic illustration of the three-electrode system for HER (Hydrogen Evolution Reaction) measurements. (d) Hydrogen Evolution Reaction (HER) characteristics for rLGO-A, rMGO-A, and rSGO-A electrodes.

Supporting Information Fig. S4

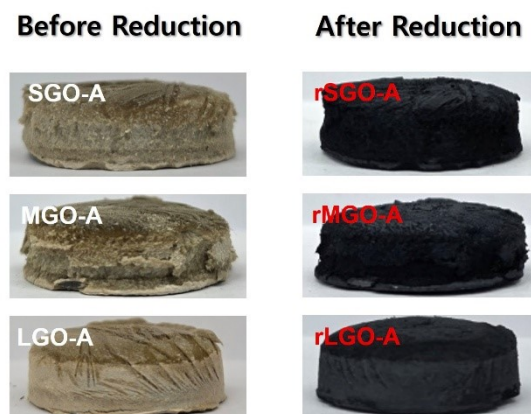

Fig. S4. Digital images of SGO-A, MGO-A, and LGO-A before and after reduction.

Supporting Information Fig. S5

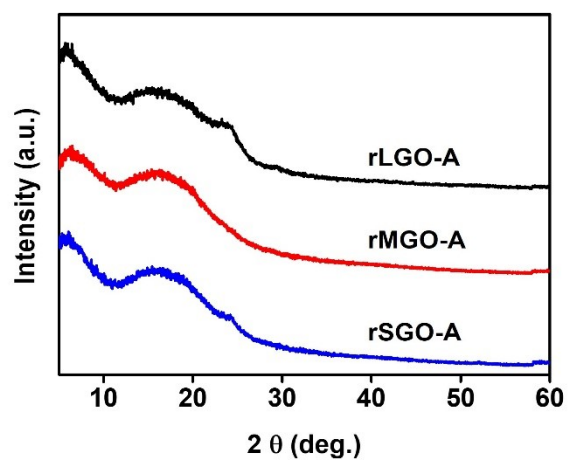

Fig. S5. X-ray diffraction of rLGO-A, rMGO-A and rSGO-A.

Supporting Information Fig. S6

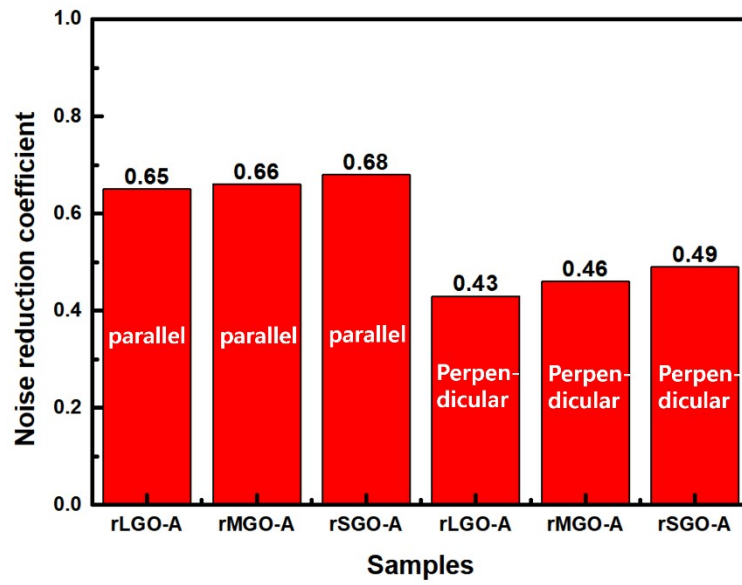

Fig. S6. Comparison of NRC(Noise reduction coefficient) values of the Parallel rGO-A and the Perpendicular rGO-A
